# Supplementary material
Source: bioRxiv or medRxiv preprint supplement (https://www.biorxiv.org/highwire/filestream/123140/field_highwire_adjunct_files/4/358622-5.pdf)

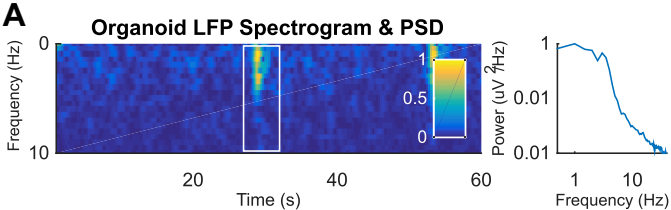

**B** **EEG (LFP) Feature over Time**

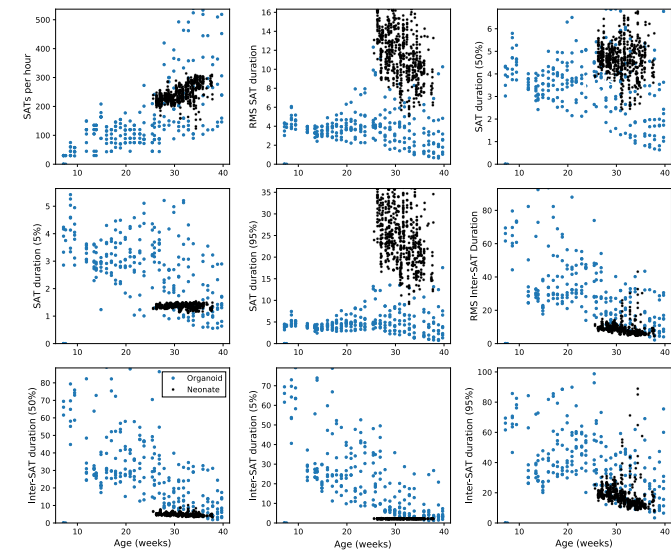

**C** **Resampled Pearson Correlation**

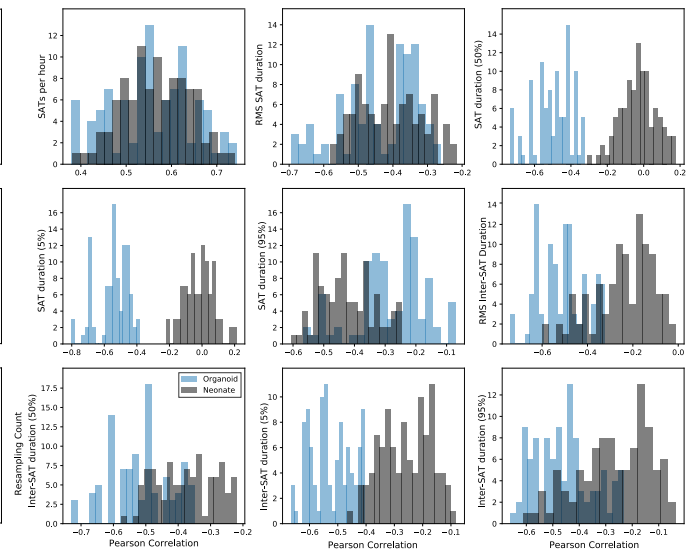

Supplement: Supplementary file [file 358622-5.pdf]
